## Deoxyribonucleic Acid Profiling Analysis of 40 Human Thyroid Cancer Cell Lines Reveals Cross-Contamination Resulting in Cell Line Redundancy and Misidentification

Rebecca E. Schweppe, Joshua P. Klopper, Christopher Korch, Umarani Pugazhenth, Miriam Benezra, Jeffrey A. Knauf, James A. Fagin, Laura A. Marlow, John A. Copland, Robert C. Smallridge, and Bryan R. Haugen

Division of Endocrinology, Diabetes and Metabolism (R.E.S., J.P.K., U.P., B.R.H.), Department of Medicine and University of Colorado Cancer Center DNA Sequencing and Analysis Core (C.K.), University of Colorado Cancer Center, University of Colorado Denver, Aurora, Colorado 80045; Human Oncology and Pathogenesis Program (M.B., J.A.K., J.A.F.), Memorial Sloan-Kettering Cancer Center, New York, New York, 10021; and Division of Endocrinology (R.C.S.), Internal Medicine Department, Department of Cancer Biology (L.A.M., J.A.C.), Mayo Clinic Comprehensive Cancer Center, Jacksonville, Florida 32224

**Context:** Cell lines derived from human cancers provide critical tools to study disease mechanisms and develop novel therapies. Recent reports indicate that up to 36% of cell lines are cross-contaminated.

**Objective:** We evaluated 40 reported thyroid cancer-derived cell lines using short tandem repeat and single nucleotide polymorphism array analysis.

**Results:** Only 23 of 40 cell lines tested have unique genetic profiles. The following groups of cell lines are likely derivatives of the same cell line: BHP5-16, BHP17-10, BHP14-9, and NPA87; BHP2-7, BHP10-3, BHP7-13, and TPC1; KAT5, KAT10, KAT4, KAT7, KAT50, KAK1, ARO81-1, and MRO87-1; and K1 and K2. The unique cell lines include BCPAP, KTC1, TT2609-C02, FTC133, ML1, WRO82-1, 8505C, SW1736, Cal-62, T235, T238, Uth-104, ACT-1, HTh74, KAT18, TTA1, FRO81-2, HTh7, C643, BHT101, and KTC-2. The misidentified cell lines included the DRO90-1, which matched the melanoma-derived cell line, A-375. The ARO81-1 and its derivatives matched the HT-29 colon cancer cell line, and the NPA87 and its derivatives matched the M14/MDA-MB-435S melanoma cell line. TTF-1 and Pax-8 mRNA levels were determined in the unique cell lines.

**Conclusions:** Many of these human cell lines have been widely used in the thyroid cancer field for the past 20 yr and are not only redundant, but not of thyroid origin. These results emphasize the importance of cell line integrity, and provide the short tandem repeat profiles for a panel of thyroid cancer cell lines that can be used as a reference for comparison of cell lines from other laboratories.

(*J Clin Endocrinol Metab* 93: 4331–4341, 2008)

Cell lines derived from human tumors are widely used to study the mechanisms involved in cancer, as well as to serve as preclinical models to assess efficacy of novel therapies. Despite the importance of cell line integrity, cell line uniqueness or derivation from the original tumor is rarely verified, even though

repeated reports have shown that this is a long-standing problem. HeLa was the first human cell line established in 1952 and is a well-known contaminant of numerous cell lines thought to be derived from distinct tumor types (1). Additional cross-contaminations and misidentifications have been reported, and cur-

0021-972X/08/\$15.00/0

Printed in U.S.A.

Copyright © 2008 by The Endocrine Society

doi: 10.1210/jc.2008-1102 Received May 22, 2008. Accepted August 12, 2008.

First Published Online August 19, 2008

For editorial see page 4226

Abbreviations: ATC, Anaplastic thyroid carcinoma; ATCC, American Type Culture Collection; DSMZ, German Collection of Microorganisms and Cell Cultures; ECACC, European Collection for Cell Cultures; FAM, 6-carboxyfluorescein; FTC, follicular thyroid carcinoma; LOH, loss of heterozygosity; PTC, papillary thyroid cancer; qRT-PCR, quantitative RT-PCR; SNP, single nucleotide polymorphism; STR, short tandem repeat; TAMRA, 6-carboxy-tetramethylrhodamine; WT, wild type.

rent estimates indicate that 18–36% of cell lines are cross-contaminated or misidentified, including cell lines within the National Cancer Institute-60 panel (1–4). Of note, many cases of cell line cross-contamination occur at the source and are often cross-contaminated with older, more established cancer-derived cell lines, indicating that the intended cell line was never established (1, 5–9). Therefore, it is critical to evaluate cell line integrity even if cell lines are obtained from the source. Recently, the National Institutes of Health has recognized the problem and has issued a notice that cell line authentication must accompany grant applications (10).

A comprehensive analysis of commonly used human thyroid cancer cell lines is currently lacking, despite three recent reports that have identified redundant cell lines (11–13). Meireles *et al.* (11) reported that the papillary thyroid cancer (PTC)-derived FB2 and TPC1 cell lines, which both harbor the RET/PTC1 rearrangement, are genetically identical, and van Staveren (12) and Rocha (13) *et al.* reported redundancy among the KAK-1, KAT10, and KAT4 cell lines, which all share a point mutation in E-cadherin, a rare event in thyroid cancer. We used short tandem repeat (STR) profiling and single nucleotide polymorphism (SNP) array analysis to systematically evaluate the integrity of the thyroid cancer cell lines in our laboratories (3). STR profiling was originally developed for forensic applications (14) and has been established as an international reference standard for genetically profiling cell lines (3). All major cell line repositories use STR profiling to authenticate their cell lines, thus increasing the power of this approach in the form of searchable STR profile databases. In this study we genetically analyzed 40 thyroid cancer cell lines. We found significant redundancy among the cell lines and misidentification of some cell lines that are likely not of thyroid cancer origin.

## Materials and Methods

### Cells and cell culture

Cell lines, as well as year of first publication, and reported mutation status are listed in Table 1, and were obtained from the primary source or the American Type Culture Collection (ATCC) with the exception of the following. BCPAP cells were kindly provided by Dr. M. Santoro (Medical School, University “Federico II” of Naples, Naples, Italy). K1 and K2 cell lines were provided by Dr. Wynford-Thomas (Cardiff University, Cardiff, UK). SW1736, C643, HTh7, and HTh74 cells were provided by Dr. K. Ain (University of Kentucky, Lexington, KY) with permission from Dr. N.-E. Heldin (University Hospital, Uppsala, Sweden), and the TPC1 cells were kindly provided by Dr. S. Jhiang (Ohio State University, Columbus, OH). Although we were unable to obtain these cell lines from the source, these cell lines matched their respective STR profiles shown in previously published studies (11, 15), and/or in the German Collection of Microorganisms and Cell Cultures (DSMZ) and European Collection for Cell Cultures (ECACC) databases at all loci tested in common (Table 2). In most of these cases, we were unable to obtain cell lines from the source due to a lack of current stocks. All cell lines were grown at 37°C with 5% CO<sub>2</sub> in a humidified environment (media used for individual cell lines are available upon request). To avoid cross-contamination, cell lines were cultured separately in a sterile tissue culture hood, which was UV irradiated between each cell line, and a separate bottle of media was used for each cell line.

### DNA profiling protocol

Genomic DNA was prepared separately for each cell line in a clean hood using DNeasy Tissue kit (QIAGEN, Inc., Valencia, CA). To avoid cross-contamination, Pipetman were UV irradiated between each sample, and filtered pipette tips were used throughout the DNA preparation. The earliest or original passage of each cell line received in our laboratories was analyzed in each case. The Applied Biosystems Profiler Plus kit (ABI no. 4303326; Foster City, CA) was used with modifications. Genomic DNA (~1 ng) was used as template, and cycling conditions were those suggested by the manufacturer, and multiple aliquots of diluted PCRs were electrophoresed in an ABI 3730 genetic analyzer using the POP7 polymer and 50 cm. The data were collected using ABI's Data Collection software version 3.0, and the sizes of the PCR products for the different STR loci were determined using GeneMapper 4.0. The identities of the products were determined by comparing the product sizes with those of the different alleles present in the standard allelic ladder in the Profiler Plus kit. A no DNA template control was included in all stages of the STR analysis to exclude contamination. The profiles were compared visually or by using a searchable database (Korch, C. and J. West, personal communication) containing in-house data and data downloaded from the ATCC web site ([www.atcc.org/common/cultures/str.cfm](http://www.atcc.org/common/cultures/str.cfm)). The ECACC and DSMZ databases were manually searched with the STR profiles.

### SNP arrays

The genetic identity of some of the commonly used thyroid cancer cell lines was further characterized by SNP genotyping, using Affymetrix 250K SNP arrays (Santa Clara, CA). Each sample was restricted with *NspI*, labeled, and hybridized to the Affymetrix GeneChip Human Mapping 250K SNP array, according to the manufacturer's instructions. Genotyping calls were generated using GType 1.1.

### BRAF mutation analysis

Exon 15 of BRAF was amplified from genomic DNA (120 ng) using standard touchdown PCR methods with the following primers: BRAF-forward, 5'-TCATAATGCTTGCTCTGATAGGA-3'; and BRAF-reverse, 5'-GGCCAAAAATTTAATCAGTGGA-3'. Residual primers and deoxynucleotide triphosphates were removed before sequencing using the ExoSAP-IT kit (USB Corp., Cleveland, OH). DNA samples were sequenced using the BRAF-For primer by the University of Colorado Cancer Center DNA Sequencing & Analysis Core (<http://loki.uchsc.edu>).

### RET/PTC1 analysis

Total RNA was isolated from cells/tissues using RNeasy Mini Kit (QIAGEN) and reverse transcribed using Moloney Murine leukemia virus reverse transcriptase (Life Technologies, Inc., Gaithersburg, MD). The primers used for RET/PTC1 amplification were: RET/PTC1 (F) 5'-ATTGTCATCTCGCCGTC-3' and RET/PTC1 (R) 5'-CTTTCAGCATCTTCACGG-3'. The final PCR mixture contained 200 nM each of forward and reverse primers, 1× SYBR PCR mix (Applied Biosystems), and 5 µl cDNA template. Real-time PCR was performed with an ABI Prism 7700 sequence detector (Applied Biosystems). The thermal cycling conditions were: 2 min at 50°C, 10 min at 95°C, followed by 40 cycles of 30 sec at 95°C, 30 sec at 45°C, and 1 min at 72°C. Dissociation curves were recorded after each run, and the amplified products were visualized by 2% agarose gel electrophoresis.

### Analysis of Pax-8 and TTF-1 by real-time quantitative RT-PCR (qRT-PCR)

The mRNAs for human Pax-8 and TTF-1 were measured by real-time qRT-PCR using ABI Prism 7700 Sequence detector, as previously described (16). The following primer/probe sequences were used: Pax-8 (F) 5'-GGACTACAAACGCCAGAACCC-3', Pax-8 (R) 5'-GGGCACAGTGTCAATTGTCACA-3', PAX8 (Probe) 6FAM- AC-

**TABLE 1.** Summary of cell lines

| Cell line      | Year <sup>a</sup> | Type <sup>b</sup>             | Patient gender | Mutation (reported)            | Refs. <sup>c</sup> |
|----------------|-------------------|-------------------------------|----------------|--------------------------------|--------------------|
| NPA87          | 1987              | Papillary                     |                | BRAF(V600E) (22)               | 50                 |
| BHP5-16        | 1996              | Papillary                     |                | BRAF(V600E) (51)               | 52                 |
| BHP17-10       | 1996              | Papillary                     |                | BRAF(V600E) (53)               | 52                 |
| BHP14-9        | 1996              | Papillary                     |                | BRAF(V600E) (53)               | 52                 |
| KAT5           | 1992              | Papillary                     | Male           | BRAF(V600E) (53)               | 54                 |
| KAT10          | 1993              | Papillary                     | Female         | BRAF(V600E) (24)               | 55                 |
| TPC1           | 1987              | Papillary                     |                | RET/PTC1 (23)                  | 31                 |
| BHP2-7         | 1997              | Papillary                     | Female         | RET/PTC1 (51)                  | 36                 |
| BHP10-3        | 1997              | Papillary                     | Female         | RET/PTC1 (53)                  | 36                 |
| BHP7-13        | 1997              | Papillary                     | Female         | RET/PTC1 (53)                  | 36                 |
| K1             | 1997              | Papillary                     |                | BRAF(V600E), PI3K (E542K)      | 56                 |
| K2             | 1997              | Papillary                     |                | BRAF(V600E) (57), PI3K (E542K) | 56                 |
| BCPAP          | 1992              | Papillary                     | Female         | BRAF(V600E) (57)               | 58                 |
| KTC-1          | 2000              | Papillary                     | Male           | BRAF V600E (23)                | 32                 |
| KAT50          | 1998              | Differentiated                | Male           |                                | 59                 |
| TT2609-CO2     | 1996              | Follicular                    | Male           |                                | 60                 |
| FTC133         | 1989              | Follicular                    | Male           |                                | 61, 62             |
| ML1            | 2000              | Follicular                    | Female         |                                | 63                 |
| WRO82-1        | 1982              | Follicular                    | Female         | BRAF WT (23)                   | 64                 |
| MRO87-1        | 1987              | Follicular                    |                | BRAF WT (37), BRAF V600E (24)  | 65                 |
| KAK1           | 1992              | Follicular adenoma            |                | BRAF V600E (24)                | 66                 |
| KAT7           | 1999              | Benign follicular hyperplasia |                | BRAF V600E (27)                | 67                 |
| KAT4           | 1992              | Anaplastic                    | Female         | BRAF(V600E) (24, 26)           | 68                 |
| FRO81-2        | 1981              | Anaplastic                    |                | BRAF(V600E) (23)               | 69                 |
| ARO81-1        | 1981              | Anaplastic                    |                | BRAF(V600E) (24, 26)           | 70                 |
| DRO90-1        | 1990              | Anaplastic                    |                | BRAF(V600E) (24)               | 71                 |
| 8505C          | 1993              | Anaplastic                    | Female         | BRAF V600E (11)                | 72                 |
| SW1736         |                   | Anaplastic                    |                | BRAF(V600E) (24)               | 24                 |
| Cal-62         | 1988              | Anaplastic                    | Female         | BRAF WT (26)                   | 73                 |
| T235           | 2007              | Anaplastic                    | Female         |                                | 74                 |
| T238           | 2007              | Anaplastic                    | Female         |                                | 74                 |
| Uth-104        | 1996              | Anaplastic                    | Female         | BRAF V600E (15)                | 15                 |
| ACT-1          |                   | Anaplastic                    |                |                                | 75                 |
| HTh7           | 1983              | Anaplastic                    |                | BRAF WT (15)                   | 76                 |
| HTh74          | 1991              | Undifferentiated              |                | BRAF WT (11)                   | 77                 |
| KAT18          |                   | Anaplastic                    |                | BRAF WT (24)                   | 55                 |
| TTA1           |                   | Anaplastic                    |                |                                | 78                 |
| C643           | 1996              | Anaplastic                    | Male           | HRAS (G13R) (11)               | 79                 |
| BHT101         | 1993              | Anaplastic                    | Female         | BRAF V600E (26)                | 80                 |
| KTC-2          | 2003              | Anaplastic                    | Female         |                                | 81                 |
| M14/MDA-MB-435 | 1976              | Melanoma                      |                | BRAF V600E (20, 21)            | 19                 |
| HT-29          | 1964              | Colon cancer                  | Female         | BRAF V600E (29)                | 30                 |
| A-375          | 1973              | Melanoma                      | Female         | BRAF V600E (40)                | 46                 |

<sup>a</sup> Year established or first described, if known.<sup>b</sup> Stated tumor tissue of origin.<sup>c</sup> Earliest known reference of cell line.

CATGTTTGCCTGGGAGATCCGA-TAMRA, TTF-1 (F) 5'-AC-GACTCCGTTCTCAGTGTCTG-3', TTF-1 (R) 5'-GCCCTCCA TGCCCACTTT-3', TTF1 (probe) 6FAM- CATCTTGAGTCCCCT-GGAGGAAAGCTACA-TAMRA. The TaqMan probes were purchased from ABI, 5'-labeled with 6-carboxyfluorescein (FAM) and 3'-labeled with 6-carboxy-tetramethylrhodamine (TAMRA). Thermal cycling conditions were as follows, and reactions were performed in duplicate. Reverse transcription was performed at 48 C for 30 min, followed by activation of AmpliTaq Gold at 95 C for 10 min, followed by 40 cycles of amplification at 95 C for 15 sec and 60 C for 1 min. Each PCR run included the standard curve (10-fold serially diluted human normal thyroid RNA), test samples, no-template, and no reverse transcriptase controls. The standard curve was used to calculate the relative amounts of targets in test samples. Quantities of Pax-8 and TTF1 in test samples were normalized to the corresponding 18s rRNA

(PE ABI, P/N 4308310). Genomic DNA was isolated from normal and papillary thyroid carcinoma tissue (Cooperative Human Tissue Network, National Cancer Institute, Bethesda, MD), or anaplastic thyroid carcinoma (ATC) tissue (Mayo Clinic, Jacksonville, FL). Tissue sample no. 9N was used for the standard curve.

## Results

### The PTC-derived BHP5-16, BHP17-10, BHP14-9, and NPA87 cells are genetically identical to each other and the MDA-MB-435/M14 melanoma cell line

DNA profiling using STRs was performed on the 40 cell lines using 10 different genetic markers, including nine STR loci

**TABLE 2.** DNA profiling of cancer cell lines

| Cell line                      | D3S1358             | vWA                   | FGA                 | Amelogenin        | D8S1179                 | D21S11                | D18S51              | D5S818                            | D13S317             | D7S820               |
|--------------------------------|---------------------|-----------------------|---------------------|-------------------|-------------------------|-----------------------|---------------------|-----------------------------------|---------------------|----------------------|
| <i>MDA-MB-4355<sup>a</sup></i> | 14 <sup>b</sup>     | 16, 18 <sup>b,c</sup> | 21 <sup>b</sup>     | X <sup>b,c</sup>  | 13 <sup>b</sup>         | 30 <sup>b</sup>       | 13 <sup>b</sup>     | 12 <sup>b,c</sup>                 | 12 <sup>b,c</sup>   | 8, 10 <sup>b,c</sup> |
| NPA87 <sup>a</sup>             | 14, 16              | 16, 18                | 21                  | X                 | 13                      | 30                    | 13, 17              | 11, 12                            | 12                  | 8                    |
| BHP 5-16 <sup>a</sup>          | 14, 16              | 16, 18                | 21                  | X                 | 13                      | 30                    | 13, 17              | 11, 12                            | 12                  | 8, 10                |
| BHP 17-10 <sup>a</sup>         | 14, 16              | 16, 18                | 21                  | X                 | 13                      | 30                    | 13, 17              | 11, 12                            | 12                  | 8, 10                |
| BHP 14-9 <sup>a</sup>          | 14, 16              | 16, 18                | 21                  | X                 | 13                      | 30                    | 13, 17              | 11, 12                            | 12                  | 8, 10                |
| <i>HT-29<sup>a</sup></i>       | 15, 17              | 17, 19 <sup>c</sup>   | 20, 22              | X <sup>c</sup>    | 10, 16                  | 29, 30                | 13                  | 11, 12 <sup>c</sup>               | 11, 12 <sup>c</sup> | 10 <sup>c</sup>      |
| ARO81-1,8 <sup>a,d</sup>       | 15, 17              | 17, 19                | 20, 22              | X                 | 10, 16                  | 30                    | 13                  | 11, 12                            | 11                  | 10                   |
| MRO87-1 <sup>a</sup>           | 15, 17              | 17, 19                | 20, 22              | X                 | 10, 16                  | 30                    | 13                  | 11, 12                            | 11                  | 10                   |
| KAT5 <sup>a</sup>              | 15, 17              | 17, 19                | 20, 22              | X                 | 10, 16                  | 30                    | 13                  | 11, 12                            | 11                  | 10                   |
| KAT10 <sup>a</sup>             | 15, 17              | 17, 19                | 20, 22              | X                 | 10, 16                  | 30                    | 12, 13              | 11, 12                            | 11                  | 10                   |
| KAT4 <sup>a</sup>              | 15, 17 <sup>e</sup> | 17, 19 <sup>e</sup>   | 20, 22 <sup>e</sup> | X <sup>e</sup>    | 10, 16 <sup>e</sup>     | 30 <sup>e</sup>       | 13 <sup>e</sup>     | 11, 12 <sup>e</sup>               | 11 <sup>e</sup>     | 10 <sup>e</sup>      |
| <i>A-375<sup>a,f</sup></i>     | 15, 17              | 16, 17 <sup>c</sup>   | 20, 23              | X <sup>c</sup>    | 11, 14                  | 29, 30                | 12, 17              | 12 <sup>c</sup>                   | 11, 14 <sup>c</sup> | 9 <sup>c</sup>       |
| DRO90-1 <sup>a,f</sup>         | 15, 17              | 16, 17 <sup>c</sup>   | 20, 23              | X <sup>c</sup>    | 11, 14                  | 29, 30                | 12, 17              | 12 <sup>c</sup>                   | 11, 14 <sup>c</sup> | 9 <sup>c</sup>       |
| TPC1 <sup>a</sup>              | 16, 17              | 14, 18                | 20, 21              | X                 | 11, 17                  | 30, 31.2              | 13, 16              | 8, 10                             | 11, 12              | 11                   |
| BHP 2-7 <sup>a</sup>           | 16, 17              | 14, 18                | 20, 21              | X                 | 11, 17                  | 30, 31.2              | 13, 16              | 8, 10                             | 11, 12              | 11                   |
| BHP 10-3 <sup>a</sup>          | 16, 17              | 14, 18                | 20, 21              | X                 | 11, 17                  | 30, 31.2              | 13, 16              | 8, 10                             | 11, 12              | 11                   |
| BHP 7-13 <sup>a</sup>          | 16, 17              | 14, 18                | 20, 21              | X                 | 11, 17                  | 30, 31.2              | 13, 16              | 8, 10                             | 11, 12              | 11                   |
| K1 <sup>a</sup>                | 18 <sup>g</sup>     | 17, 18 <sup>g</sup>   | 21, 24 <sup>g</sup> | X, Y <sup>g</sup> | 15 <sup>g</sup>         | 30, 31.2 <sup>g</sup> | 18 <sup>g</sup>     | 10, 11                            | 11, 14              | 11                   |
| K2 <sup>a</sup>                | 18                  | 17, 18                | 21, 24              | X, Y              | 15                      | 30, 31.2              | 18                  | 10, 11                            | 11, 14              | 11                   |
| BCPAP <sup>a,d</sup>           | 16, 17              | 14, 17 <sup>h</sup>   | 20, 23              | X <sup>h</sup>    | 12, 13                  | 30, 31.2              | 13, 17              | 10 <sup>h</sup> , 11 <sup>h</sup> | 12 <sup>h</sup>     | 10 <sup>h</sup>      |
| KTC-1 <sup>d</sup>             | 14, 15              | 14, 17                | 23, 26              | X, Y              | 11, 14                  | 29                    | 12, 13              | 11, 12                            | 11                  | 11                   |
| TT2609-CO2 <sup>d</sup>        | 16                  | 17, 18 <sup>h</sup>   | 22, 25              | X, Y <sup>h</sup> | 12, 13                  | 28, 30                | 14                  | 12 <sup>h</sup>                   | 11, 13 <sup>h</sup> | 8, 10 <sup>h</sup>   |
| FTC133 <sup>d</sup>            | 15 <sup>i</sup>     | 15, 18 <sup>i</sup>   | 21 <sup>i</sup>     | X <sup>i</sup>    | 10 <sup>i</sup>         | 32.2 <sup>i</sup>     | 11, 12 <sup>i</sup> | 12 <sup>i</sup>                   | 11 <sup>i</sup>     | 9, 10 <sup>i</sup>   |
| ML1 <sup>d</sup>               | 15                  | 17, 18 <sup>h</sup>   | 22, 25              | X <sup>h</sup>    | 10, 13                  | 31.2, 33.2            | 18                  | 12, 13 <sup>h</sup>               | 10 <sup>h</sup>     | 10 <sup>h</sup>      |
| WRO82-1 <sup>a</sup>           | 14, 16 <sup>j</sup> | 17, 18 <sup>i</sup>   | 20 <sup>i</sup>     | X <sup>i</sup>    | 13, 14 <sup>i</sup>     | 29, 31 <sup>i</sup>   | 17 <sup>i</sup>     | 11, 12 <sup>i</sup>               | 13 <sup>i</sup>     | 11 <sup>i</sup>      |
| 8505C <sup>d</sup>             | 16, 17 <sup>i</sup> | 17, 19 <sup>h,i</sup> | 23 <sup>i</sup>     | X <sup>h,i</sup>  | 10, 13 <sup>i</sup>     | 28, 32.2 <sup>i</sup> | 16 <sup>i</sup>     | 10, 11 <sup>h,i</sup>             | 13 <sup>h,i</sup>   | 10 <sup>h,i</sup>    |
| SW1736 <sup>a,d</sup>          | 16, 17 <sup>e</sup> | 16, 19 <sup>e</sup>   | 22 <sup>e</sup>     | X <sup>e</sup>    | 13, 14 <sup>e</sup>     | 29, 31 <sup>e</sup>   | 14 <sup>e</sup>     | 12, 13 <sup>e</sup>               | 11, 12 <sup>e</sup> | 8, 11 <sup>e</sup>   |
| Cal-62 <sup>d</sup>            | 16                  | 16 <sup>h</sup>       | 19                  | X <sup>h</sup>    | 13                      | 32.2                  | 16                  | 9, 12 <sup>h</sup>                | 12                  | 10 <sup>h</sup>      |
| T235 <sup>d</sup>              | 14                  | 17, 18                | 21, 23              | X                 | 11, 14                  | 29                    | 13, 19              | 9, 12                             | 11, 14              | 8, 10                |
| T238 <sup>d</sup>              | 16                  | 16, 17                | 21, 22              | X                 | 12                      | 30                    | 10, 17              | 11                                | 12                  | 11, 13               |
| Uhth-104 <sup>d</sup>          | 14 <sup>e</sup>     | 14, 16 <sup>e</sup>   | 23 <sup>e</sup>     | X <sup>e</sup>    | 12, 13 <sup>e</sup>     | 27, 31.2 <sup>e</sup> | 14, 19 <sup>e</sup> | 12 <sup>e</sup>                   | 12 <sup>e</sup>     | 10 <sup>e</sup>      |
| ACT-1 <sup>d</sup>             | 16                  | 17, 18                | 23, 24              | X                 | 11, 14                  | 30, 31                | 15, 16              | 11, 13                            | 10, 12              | 10, 11               |
| HTH74 <sup>a,d</sup>           | 15 <sup>e</sup>     | 17, 19 <sup>e</sup>   | 25 <sup>e</sup>     | X <sup>e</sup>    | 13, 15, 16 <sup>e</sup> | 32 <sup>e</sup>       | 14 <sup>e</sup>     | 11, 12 <sup>e</sup>               | 12, 13 <sup>e</sup> | 8, 9 <sup>e</sup>    |
| KAT18 <sup>a,d</sup>           | 15                  | 16                    | 20, 21              | X                 | 14, 16                  | 30, 31                | 14                  | 10, 12                            | 11                  | 10                   |
| TTA1 <sup>d</sup>              | 15                  | 17                    | 23                  | X                 | 13, 15                  | 30                    | 15                  | 12, 13                            | 12                  | 11, 12               |
| FRO81-2 <sup>a</sup>           | 17                  | 16                    | 22                  | X, Y              | 13, 14                  | 28, 30                | 12, 15              | 10, 14                            | 9                   | 12, 13               |
| HTH7 <sup>a,d</sup>            | 14, 15 <sup>e</sup> | 14, 18 <sup>e</sup>   | 20, 23 <sup>e</sup> | X <sup>e</sup>    | 12, 13 <sup>e</sup>     | 29, 30 <sup>e</sup>   | 16 <sup>e</sup>     | 11 <sup>e</sup>                   | 11, 14 <sup>e</sup> | 8, 11 <sup>e</sup>   |
| C643 <sup>a,d</sup>            | 15 <sup>e</sup>     | 15, 17 <sup>e</sup>   | 18, 21 <sup>e</sup> | X, Y <sup>e</sup> | 11, 13 <sup>e</sup>     | 28 <sup>e</sup>       | 14, 18 <sup>e</sup> | 11, 12 <sup>e</sup>               | 8, 10 <sup>e</sup>  | 9, 12 <sup>e</sup>   |
| BHT101 <sup>d</sup>            | 16, 17              | 18, 19 <sup>h</sup>   | 18, 24              | X <sup>h</sup>    | 13, 14, 15              | 29, 32.2              | 12, 15              | 10, 11 <sup>h</sup>               | 12 <sup>h</sup>     | 10, 11 <sup>h</sup>  |
| KTC-2 <sup>d</sup>             | 15                  | 17, 18                | 23                  | X                 | 12                      | 30                    | 16                  | 12                                | 8, 12               | 11                   |

Rows in *italics* indicate that this cell line is likely the original, nonthyroid cell line from which the other cell lines in this group were derived from.

<sup>a</sup> Tested in the Haugen laboratory.

<sup>b</sup> Also tested by Rae *et al.* (18).

<sup>c</sup> Also tested by the ATCC.

<sup>d</sup> Tested in the Fagin laboratory.

<sup>e</sup> Also tested by Lee *et al.* (15).

<sup>f</sup> Tested in the Molecular Genetics Laboratory at the Mayo Clinic.

<sup>g</sup> Also tested by the ECACC.

<sup>h</sup> Also tested by the DSMZ.

<sup>i</sup> Also tested by van Staveren *et al.* (12).

(D3S1358, vWA, FGA, D8S1179, D21S11, D18S51, D5S818, D13S317, and D7S820) and amelogenin. For these loci the probability of two samples selected at random having an identical profile is less than one in  $10^{10}$ . As shown in Table 2, the PTC cell lines BHP5-16, BHP17-10, and BHP14-9 were identical to each other at all 10 loci. The BHP5-16, BHP17-10, and BHP14-9 were also identical to the PTC-derived NPA87 cell line at nine loci. The STR profile of the NPA87 cell line from the Haugen and Fagin laboratories was identical. BHP5-16, BHP17-10, and BHP14-9 are heterozygous at the D7S820 locus (8- and 10-repeat alleles), whereas the NPA87 cells have lost the 10-repeat allele (Table 2). These results indicate that the BHP5-16, BHP17-10, and BHP14-9 cell lines are not only identical to each other, but also to the NPA87 cell line.

The ATCC database was searched with BHP5-16, BHP17-10, BHP14-9, and NPA87 profiles, and identified the MDA-MB-435S cell line as a match at all five loci tested in common (Table 2; vWA, D5S818, D13S317, D7S820, plus amelogenin). Of note, the MDA-MB-435 breast cancer cell line has recently been identified as a derivative of the M14 melanoma cell line (17, 18). Because the original M14 cell line is not available through the ATCC, we obtained and analyzed the MDA-MB-435S genomic DNA from the ATCC and found it to have an identical STR profile to the aforementioned cancer cell lines at all loci except the D18S51, D5S818, and D3S1358 loci, where the MDA-MB-435S exhibited a loss of heterozygosity (LOH) (Table 2). These profiles are consistent with the STR profile of an original stock of the MDA-MB-435 cell line from MD Anderson Cancer Center in addition to a cell stock from the Lombardi Comprehensive Cancer Center (Table 2 and Ref. 18). The M14 melanoma cell line was established in 1976 from a metastatic amelanotic lesion (19), predating the reported establishment of the NPA87 cell line and its derivatives. Because NPA87 is a commonly used thyroid cancer cell line, we further examined this using 250K SNP arrays. This showed that NPA87 is identical to BHP5-16, BHP17-10, BHP14-9, and MDA-MB-435S/M14 at 96.1% of the polymorphic sites, confirming the genetic identity of these cell lines.

The MDA-MB-435/M14 cell line has been reported to express a heterozygous BRAF V600E mutation (20, 21). In contrast, the NPA87 cells have been reported to express both a homo/hemizygous BRAF mutation (22, 23) and a heterozygous BRAF mutation (24). The NPA87 cell line and the BHP5-16, BHP17-10, and BHP14-9 cell lines in our laboratories (B.R.H. and J.A.F.) express a homo/hemizygous BRAF V600E mutation (22) (data not shown). We analyzed the BRAF V600E mutational status in the MDA-MB-435S cells from the ATCC and found that the MDA-MB-435S cell lines express a heterozygous BRAF V600E mutation (data not shown). This difference is likely due to a LOH that occurred during culturing (25).

**The thyroid cancer derived KAT5, KAT10, KAT4, KAT7, KAT50, KAK1, ARO81-1, and MRO87-1 cell lines are identical to each other and to the colon cancer-derived HT-29 cell line**

The PTC-derived KAT5 and KAT10 cells, the ATC-derived KAT4 and ARO81-1, and the follicular thyroid carcinoma

(FTC)-derived MRO87-1 cells were analyzed by STR, and found to be genetically similar and likely identical. The KAT10 cells differed at the D18S51 locus, which in addition to a 13-repeat allele, also retained a 12-repeat allele (Table 2). These results are consistent with recent studies, which found the KAT4, KAT10, and FTC-derived KAK1 cells to be identical by STR profiling (12, 13). In addition, the KAT4 STR profile shown here is identical to that published recently by Lee *et al.* (15), except at the D8S1179 locus there was a 16-repeat allele in addition to the 10-repeat allele that we observed here (Table 2). These differences are likely due to clonal drift, and indicate that the KAT5, KAT10, and KAT4 cells are identical. We also found that the KAT5, KAT10, and KAT4 cell lines were not only identical to each other, but also to the MRO87-1 and ARO81-1 cell lines (Table 2). The ARO81-1 cell line from the Haugen and Fagin laboratories showed identical STR profiles. By 250K SNP array analysis, we found that the KAT7 and KAK1 cell lines from the Fagin laboratory are identical to the ARO81-1 cell lines at 97.1% of the sites, and the KAT50 and ARO81-1 cell lines share identity at 97.4% of the sites, proving that they are derivatives from the same line.

By searching the ATCC database, we discovered that the STR profiles of these cell lines matched that of the HT-29 colon cancer cell line at those loci tested in common (Table 2). Therefore, we obtained the HT-29 cell line from the ATCC and found that the STR profile of the HT-29 cell line is identical to that of the ARO81-1, MRO87-1, KAT5, KAT10, and KAT4 except at the D21S11 locus, where the HT-29 cell line retained the 29-repeat allele. The HT-29 cells also differed from the KAT10 cells at the D18S51 locus as discussed previously. By SNP 250K array genotyping, ARO81-1 and HT-29 were identical at 93.1% of the sites, confirming that they are genetically identical.

Consistent with previous studies, we found that the KAT5, KAT10, and KAT4 cells express a heterozygous BRAF mutation (24, 26, 27) (data not shown). Previous studies regarding BRAF mutational status in ARO81-1 cells have shown that these cells are homo/hemizygous (24) or heterozygous (23, 26, 27). The ARO81-1 cells in our laboratories (B.R.H. and J.A.F.) express a heterozygous BRAF mutation, consistent with that reported by two other laboratories (23, 27), and consistent with the ARO81-1 cell line matching the KAT5, KAT10, KAT4, KAK1, and KAT7 cell lines. The BRAF V600E mutation is also prevalent in colon cancer (28), and we found that the HT-29 colon cancer cell line from the ATCC expressed a heterozygous BRAF mutation, consistent with a previous report (29) and the genetic identity of these cell lines. The HT-29 colon cancer cell line was established in 1964 (30), before the establishment of the ARO81-1 cell line, which was established in 1981.

**The ATC cell line DRO90-1 is genetically identical to the A-375 melanoma-derived cell line**

The ATC-derived DRO90-1 cell line was profiled by STR analysis (Table 2). This cell line was unique among our panel of thyroid cancer cell lines; however, the DRO90-1 matched the STR profile of the A-375 melanoma cell line (ATCC database) at all five overlapping loci. Therefore, we obtained the earliest available passage of the A-375 cell line (passage 10 from 1972),



and we found that these two cell lines were identical at all 10 loci (Table 2). We further confirmed that the A-375 and DRO90-1 cell lines both express a homo/hemizygous BRAF mutation and lack TTF-1 and Pax-8 expression (data not shown). These results indicate that the DRO90-1 cell line (established in 1990) is genetically identical to the A-375 melanoma cell line by STR profiling.

#### The PTC-derived BHP2-7, BHP10-3, BHP7-13, and TPC1 cells are genetically identical

Table 2 shows that the BHP2-7, BHP10-3, and BHP7-13 cells are not only identical to each other by STR analysis, but also to the TPC1 cell line, which was the original cell line isolated (31). We have confirmed the presence of the RET/PTC1 rearrangement in the BHP2-7, BHP10-3, BHP7-13, and TPC1 cell lines by

SYBR green RT-PCR (Table 3 and data not shown). Expression levels of the thyroid-specific transcription factors, Pax-8 and TTF-1, were evaluated by qRT-PCR, and high levels of Pax-8 mRNA were observed by qRT-PCR (Table 3; 407 pg mRNA/ng rRNA), further supporting the TPC1 cell line as a cell line derived from thyroid cancer. TTF-1 expression was not detected by qRT-PCR (Table 3), consistent with previous studies (11).

#### The PTC-derived K1 and K2 cell lines are genetically identical

The PTC-derived K1 and K2 cell lines have identical STR profiles as shown in Table 2. The STR profiles obtained for the K1 and K2 cells in our study match the K1 STR profile provided by the ECACC (personal communication) for those loci tested in common (Table 2). We have confirmed the presence of the BRAF

**TABLE 3.** Mutational status and thyroid-specific gene expression in the unique thyroid cancer cell lines

| Cell line         | Tumor type | BRAF                          | RET/PTC1 | Pax-8 <sup>a</sup>                  | TTF-1 <sup>a</sup>                  |
|-------------------|------------|-------------------------------|----------|-------------------------------------|-------------------------------------|
| BCPAP             | PTC        | V600E <sup>b,c</sup>          | WT       | 229 <sup>b</sup> , 783 <sup>d</sup> | 457 <sup>b</sup> , 598 <sup>d</sup> |
| KTC-1             | PTC        |                               |          | 651 <sup>d</sup>                    | 274 <sup>d</sup>                    |
| K1                | PTC        | V600E/WT <sup>b</sup>         | WT       | 627 <sup>b</sup>                    | 0 <sup>b</sup>                      |
| TPC1              | PTC        | WT <sup>b,d</sup>             | RET/PTC1 | 407 <sup>b</sup>                    | 0 <sup>b</sup>                      |
| TT2609-CO2        | FTC        |                               |          | 0 <sup>d</sup>                      | 687 <sup>d</sup>                    |
| FTC133            | FTC        |                               |          | 76 <sup>d</sup>                     | 298 <sup>d</sup>                    |
| ML1               | FTC        |                               |          | 40 <sup>d</sup>                     | 205 <sup>d</sup>                    |
| WRO82-1           | FTC        | V600E <sup>b</sup>            |          | 126 <sup>b</sup>                    | 0 <sup>b</sup>                      |
| 8505C             | ATC        | V600E/V600E <sup>d</sup> (82) |          | 1 <sup>d</sup>                      | 580 <sup>d</sup>                    |
| SW1736            | ATC        | V600E/WT <sup>b</sup>         | WT       | 288 <sup>b</sup> , 288 <sup>d</sup> | 37 <sup>b</sup> , 0 <sup>d</sup>    |
| Cal-62            | ATC        | WT <sup>d</sup> (82)          |          | 288 <sup>d</sup>                    | 0 <sup>d</sup>                      |
| T235              | ATC        |                               |          | 256 <sup>d</sup>                    | 0 <sup>d</sup>                      |
| T238              | ATC        |                               |          | 230 <sup>d</sup>                    | 0 <sup>d</sup>                      |
| Uhth-104          | ATC        |                               |          | 160 <sup>d</sup>                    | 79 <sup>d</sup>                     |
| ACT-1             | ATC        | WT <sup>d</sup> (82)          |          | 80 <sup>d</sup>                     | 114 <sup>d</sup>                    |
| HTH74             | ATC        | WT <sup>b,d</sup>             | WT       | 0.6 <sup>b</sup> , 0 <sup>d</sup>   | 45 <sup>b</sup> , 7 <sup>d</sup>    |
| KAT18             | ATC        | WT <sup>b,d</sup>             | WT       | 1 <sup>b</sup> , 0.1 <sup>d</sup>   | 23 <sup>b</sup> , 0 <sup>d</sup>    |
| TTA1              | ATC        | WT <sup>d</sup> (82)          |          | 3 <sup>d</sup>                      | 0 <sup>d</sup>                      |
| FRO81-2           | ATC        | WT <sup>b</sup>               |          | 0.1 <sup>b</sup>                    | 0 <sup>b</sup>                      |
| HTH7              | ATC        | WT <sup>b</sup>               | WT       | 0.7 <sup>b</sup>                    | 0 <sup>b</sup>                      |
| C643              | ATC        | WT <sup>b,d</sup>             | WT       | 1 <sup>b</sup> , 0.3 <sup>d</sup>   | 0.03 <sup>b</sup> , 0 <sup>d</sup>  |
| BHT101            | ATC        |                               |          | 0.5 <sup>d</sup>                    | 0 <sup>d</sup>                      |
| KTC-2             | ATC        |                               |          | 0.9 <sup>d</sup>                    | 0 <sup>d</sup>                      |
| 2N <sup>e</sup>   | NORMAL     |                               |          | 1184                                | 1798                                |
| 2T <sup>f</sup>   | PTC        | WT                            | WT       | 1576                                | 3356                                |
| 3N <sup>e</sup>   | NORMAL     |                               |          | 1698                                | 4314                                |
| 3T <sup>f</sup>   | PTC        | WT                            | WT       | 259                                 | 1334                                |
| 5N <sup>e</sup>   | NORMAL     |                               |          | 1780                                | 2144                                |
| 5T <sup>f</sup>   | PTC        | V600E/WT                      | WT       | 616                                 | 2607                                |
| 6N <sup>e</sup>   | NORMAL     |                               |          | 1647                                | 2296                                |
| 6T <sup>f</sup>   | PTC        | V600E/WT                      | WT       | 988                                 | 2464                                |
| 9N <sup>e</sup>   | NORMAL     |                               |          | 1024                                | 1011                                |
| 9T <sup>f</sup>   | PTC        | V600E/WT                      | WT       | 638                                 | 1387                                |
| DH <sup>g</sup>   | ATC        |                               |          | 571                                 | 940                                 |
| W111 <sup>g</sup> | ATC        |                               |          | 2221                                | 4490                                |

<sup>a</sup> pg mRNA/ng rRNA.

<sup>b</sup> Tested in the Haugen laboratory.

<sup>c</sup> Homo/hemizygous.

<sup>d</sup> Tested in the Fagin laboratory.

<sup>e</sup> Normal thyroid tissue.

<sup>f</sup> Papillary thyroid carcinoma tissue.

<sup>g</sup> Anaplastic thyroid carcinoma tissue.

V600E mutation in addition to high levels of Pax-8 mRNA by qRT-PCR (Table 3; 627 pg mRNA/ng rRNA), which suggests that this cell line is likely of thyroid origin. TTF-1 mRNA was not detected, consistent with previous studies (11).

#### **The PTC-derived cell lines, BCPAP and KTC-1 are unique**

The PTC-derived BCPAP and KTC-1 cell line STR profiles are shown in Table 2. The BCPAP cell line does not match any of the cell lines tested in this study or any other cell line listed in the ATCC, DSMZ, or ECACC databases. The BCPAP profile reported here is identical to that reported by the DSMZ for those loci tested in common (Table 2) and also that reported by van Staveren *et al.* (12). Consistent with previous studies (11, 12), the BCPAP cells also express high levels of Pax-8 and TTF-1 mRNA, as determined by qRT-PCR (Table 3). We have also confirmed the presence of the BRAF V600E mutation (homo/hemizygous) (Table 3) (11). Likewise, the KTC-1 cells express high levels of Pax-8 and TTF-1, and express a heterozygous BRAF mutation, in agreement with previous studies (23, 32). The KTC-1 cell line does not match any other cell line listed in the ATCC, DSMZ, or ECACC databases.

#### **The FTC-derived TT2609-CO2, FTC133, ML1, and WRO82-1 cell lines are unique**

The STR profiles of the TT2609-CO2, FTC133, ML1, and WRO82-1 cell lines are shown in Table 2. The TT2609-CO2 and ML1 STR profiles are consistent with that reported in the DSMZ database, and the FTC133 STR profile is consistent with that of the ECACC (personal communication) (Table 2). The WRO82-1 STR profile from the Haugen laboratory is in agreement with a previously published profile (12), but not with that of the ECACC (personal communication) (data not shown). We found the TT2609-CO2, ML1, and FTC133 cells express wild-type (WT) BRAF, consistent with the follicular origin of these cells (Table 3). However, the WRO82-1 cell line from the Haugen laboratory expresses mutant BRAF V600E. The WRO82-1 cell line from the Haugen laboratory expresses moderate levels of Pax-8 (126 pg mRNA/ng rRNA) and undetectable TTF-1 (Table 3). In contrast, the TT2609-CO2, FTC133, and ML1 cell lines express high levels of TTF-1 (205–687 pg mRNA/ng rRNA), and low to undetectable levels of Pax-8 (0–76 pg mRNA/ng rRNA; Table 3).

#### **The ATC-derived cell lines 8505C, SW1736, Cal-62, T235, T238, Uhth-104, ACT-1, HTh74, KAT18, TTA1, FRO81-2, HTh7, C643, BHT101, and KTC-2 are unique**

The STR profiles of the 8505C, SW1736, Cal-62, T235, T238, Uhth-104, ACT-1, HTh74, KAT18, TTA1, FRO81-2, HTh7, C643, BHT101, and KTC-2 cell lines are shown in Table 2. These cells are unique among our panel of cell lines. The STR profiles of the 8505C, SW1736, Uhth-104, HTh74, HTh7, and C643 (Table 2) are in agreement with previously published profiles, with the exception of the SW1736 cell line, which showed a difference at the D3S1358 locus, the Uhth-104 cell line, which differed at the D18S51 locus, and the C643 cell line, which differed at the D18S51 locus (12, 15). The STR profiles of the 8505C, Cal-62, and BHT101 cell lines are also consistent with

their respective profiles in the DSMZ database. The STR profiles of the HTh7, HTh74, SW1736, and C643 cell lines, which were tested independently by the Fagin and Haugen laboratories, are in agreement with each other, with the exception of minor differences due to LOH. The Haugen and Fagin laboratory KAT18 STR profiles are identical. BRAF mutational status of these cell lines is in agreement with previous reports (if known), with exception of the FRO81-2 cell line from the Haugen laboratory, which express WT BRAF (Table 3). The SW1736, Cal-62, T235, T238, Uhth-104, and ACT-1 cell lines expressed moderate (80–160 pg mRNA/ng rRNA) to high (230–658 pg mRNA/ng rRNA) levels of Pax-8; and the 8505C, Uhth-104, and ACT-1 cell lines expressed high (580 pg mRNA/ng rRNA) to moderate (79–114 pg mRNA/ng rRNA) levels of TTF-1 (Table 3). The remaining cell lines expressed low to undetectable levels of Pax-8 and TTF-1.

## **Discussion**

In this report we have genetically profiled 40 presumptive thyroid cancer cell lines. We have identified 23 unique cell lines (TPC1, K1, BCPAP, HTh7, HTh74, SW1736, C643, KAT18, 8505C, FRO81-2, WRO82-1, ACT-1, BHT101, Cal-62, FTC133, KTC-1, KTC-2, ML-1, T235, T238, TT2609-CO2, TTA1, and Uhth-104), which are presumably of human thyroid cancer origin. Of these cell lines, 12 (TPC1, K1, BCPAP, SW1736, WRO82-1, ACT-1, Cal62, FTC133, KTC-1, T235, T238, and Uhth-104) express high level of Pax-8 transcription factor mRNA, eight of these cell lines (BCPAP, 8505C, ACT-1, FTC133, KTC-1, ML-1, TT2609-CO2, and Uhth-104) express high level of TTF-1 transcription factor mRNA, and five of these cell lines (BCPAP, ACT-1, FTC133, KTC-1, and Uhth-104) express both transcription factors, further supporting that they are likely of human thyroid cancer origin. Although the lack of expression of these transcription factors does not exclude thyroid origin, especially for the anaplastic cell lines, high levels of Pax-8 and/or TTF-1 provide further evidence that these are thyroid cancer-derived cell lines. Of our cell lines tested, 12 (NPA87, BHP5-16, BHP17-10, and BHP14-9; ARO81-1, MRO87-1, KAT5, KAT10, KAT4, KAT7, KAT50, KAK1) are redundant and are not likely of thyroid origin. Six of our cell lines are redundant, but likely of thyroid origin (TPC1, BHP 2-7, BHP 10-3, and BHP 7-13; K1 and K2), and the DRO90-1 cell line is not likely of thyroid origin.

The expression levels of Pax-8 and TTF-1 in the unique cell lines reported here are in agreement with previous studies analyzing the expression of these genes in many of our cell lines, including the TPC1, BCPAP, and K1 cells (11). In other cases, including the C643, 8505C, HTh74, and WRO82-1 cell lines, we observed low to undetectable levels of Pax-8 and/or TTF-1, whereas previous studies reported expression of one or both of these transcription factors (11, 12). The reason for these differences is unclear but is likely due to different cell culture or RT-PCR conditions, as discussed below. Because the expression of tissue-specific genes is often reduced or lost in undifferentiated cancer, we also analyzed the expression of these genes in normal *vs.* thyroid tumor tissues using qRT-PCR. Interestingly, de-

creased levels of Pax-8 and TTF-1 mRNA are only observed in a subset of the tumor tissue samples compared with matched normal samples, indicating that these transcription factors are not necessarily down-regulated in papillary thyroid carcinoma (Table 3). Pax-8 mRNA levels in the PTC-derived cell lines are similar to that observed in the PTC and ATC tissue samples, and are lower in the FTC- and ATC-derived cell lines. In contrast, TTF-1 expression is lower in all of the cell lines, compared with normal, PTC, and ATC tissue samples (Table 3).

The results of our BRAF mutational analysis are also consistent with previous studies, with the exception of the FRO81-2 and WRO82-1 cell lines from the Haugen laboratory, which were found to express WT and mutant BRAF, respectively (Table 3). The Haugen laboratory WRO82-1 STR profile matches that previously published by van Staveren *et al.* (12), but not that of the ECACC (personal communication) or the Fagin laboratory (data not shown). This suggests that two different WRO82-1 and FRO81-2 cell lines have been distributed based on STR profiling and BRAF mutation. Both cell lines were obtained directly from the source by each laboratory (B.R.H. and J.A.F.).

For the cell lines we believe to be genetically identical, we and others have reported distinct responses which can seem confusing. For example, we have shown that the BHP5-16, BHP17-10, and BHP14-9 cell lines are more sensitive to retinoid and rexinoid treatment than the NPA87 cell line (16), even though we have shown that they are genetically identical by STR profiling. We believe that these differences in response are due to clonal drift, which can occur when cells are maintained in culture for long periods (33–35). In contrast, we and others have found that many of the sublines identified in this study, including the BHP2-7, BHP7-13, and BHP10-3 (16, 36), and the KAK1, KAT5, KAT7, KAT10, and ARO81-1 (37, 38) indeed respond as expected for identical cell lines, suggesting that long-term culture does not necessarily result in phenotypical drift of all cell lines.

Cell line cross-contamination and misidentification are longstanding problems, and redundancy among thyroid cancer cell lines has been previously reported (KAT5, KAT10, KAT4, KAK1; and FB2, TPC1) (11–13). After initial submission of this manuscript, the DSMZ ([www.dsmz.de/](http://www.dsmz.de/)) reported that the ONCO-DG-1 PTC-derived cell line (39) is actually a derivative of the OVCAR-3 ovarian cancer cell line. We have also confirmed that the ONCO-DG-1 and OVCAR-3 cell lines are identical by STR profiling (data not shown).

STR profiling is commonly used to determine genetic identity; however, STR results can be complicated by clonal drift that occurs in culture. Indeed, we observed minor differences in cell lines we believe to be identical. For example, the NPA87 cell line differed from the BHP5-16, BHP17-10, BHP14-9, and MDA-MB-435S cell lines at the D7S820 locus, where the BHP cell lines potentially gained a 10-repeat allele or alternatively, the NPA87 cell line lost the 10-repeat allele (Table 2). These cell lines also differed at the D3S1358, D18S51, and D5S818 loci by a loss or gain of an allele (Table 2). Previous studies evaluating the STR profile of two different stocks of the MDA-MB-435 cell line from the MD Anderson Cancer Center and the Lombardi Cancer Center Tissue Shared Resource also exhibit a small degree of clonal drift, which is comparable to our results (Table 2 and Ref. 18).

Despite these differences in STR profiles due to a loss or gain in alleles, in no case did we find differences in the number of allele repeats in the cell lines we believe to be identical. Finally, none of the differences in what we believe to be identical cell lines reduced the similarity between cell line profiles to less than the 80% cutoff proposed by Masters *et al.* (3). Furthermore, by 250K SNP array analysis, the NPA87 cell line and its derivatives matched the MDA-MB-435S/M14 cell line at 96.1% of the polymorphic sites, providing further evidence that these cell lines are identical.

For the cell lines that we believe to be identical, we found that these cell lines harbor identical BRAF mutations, with the exception of the NPA87, BHP5-16, BHP17-10, and BHP14-9 cell lines, which are homo/hemizygous (23) (data not shown), whereas the MDA-MB-435S/M14 cell line is BRAF heterozygous (20, 21) (data not shown). The precise reason for this difference is not known but could be due to LOH through loss of the WT allele or to uniparental disomy, either of which can occur during long-term culturing, as discussed previously, and has been shown for the BRAF WT allele at the T1799A site in other cell lines (40, 41). We also discovered that the Haugen laboratory MRO87-1 cell line expresses a heterozygous BRAF mutation, which is not consistent with the FTC-origin of this cell line but agrees with the genetic identity with the ARO81-1, KAT5, KAT10, KAT4, and HT-29 cell lines by STR profiling (Table 2). Previous studies have shown that the MRO87-1 cell line expresses either WT BRAF or mutant BRAF V600E (24, 37), suggesting that there are two different MRO87-1 cell lines in use. Again, this cell line was obtained directly from the laboratory that generated MRO87-1.

For the cell lines we believe to be of nonthyroid origin, previous studies have shown expression of thyroid specific genes, including Pax-8 and TTF-1 in the KAT-4, KAT-10, and KAK-1 cell lines (12, 42, 43). In addition, increased expression of thyroid-specific genes after pharmacological manipulation has been shown in some of the cell lines that we believe are of nonthyroid origin, including NPA87, DRO90-1, and ARO81-1 (37, 44, 45). In most cases expression of thyroid-specific genes was detected using PCR-based assays, and it is conceivable that trace amounts of these gene products may be expressed under certain conditions in cells that are not of thyroid origin. Alternatively, RT-PCR based methods can result in the amplification of nonspecific products. Indeed, we detected moderate levels of TTF-1 mRNA in some of the cell lines we believe to be of nonthyroid origin, including the ARO81-1 cell line, using SYBR green RT-PCR (data not shown). However, using this approach we noted variable melting temperatures between different cell lines (75–82°C, data not shown) and, therefore, used TaqMan qRT-PCR to measure more accurately TTF-1 and Pax-8 mRNA levels (Table 3). Using this approach we were able to specifically measure levels of TTF-1 and Pax-8 mRNA in our cell lines and did not detect expression of either of these transcription factors in the cell lines we believe to be of nonthyroid origin, including the ARO81-1 and NPA87 cells (data not shown). Lack of expression of thyroid-specific genes has been attributed to a dedifferentiated phenotype. Given the results of the current study, it is possible that the low expression of thyroid-specific genes is due to these cell lines being of nonthyroid origin.



Although the STR profiling approach used in this study represents an accurate and powerful approach for determining cell line identity, STR profiling does not provide any information regarding tissue of origin. Because original patient material from which most of these misidentified cell lines were derived is not available, we cannot definitely identify the tissue of origin for any of these cell lines based on STR or SNP profiling. However, given the time line of establishment and lack of Pax-8 and TTF-1 expression, we believe that the NPA87, ARO81-1, MRO87-1, and DRO90-1 cell lines and their respective sublines were established by cross-contamination at the source. The “90,” “81,” and “87” in the names DRO90-1, ARO81-1, MRO87-1, and NPA87 refer to the year the cell lines were established (Canlapan, D., University of California Los Angeles, Los Angeles, CA, personal communication). Given that the first publication of the A-375 cell line was in 1973 (46), we believe that the DRO90-1 is a subline of A-375 that resulted from cell line contamination.

Likewise, the M14 melanoma cell line was established in 1976 (19), and the MDA-MB-435 misidentification with the M14 cell line occurred before 1982 (17), both of which predate the establishment of the NPA87 cell line. Of note, the M14 cell line was also established at University of California Los Angeles (originally called UCLA-SO-M14) and was used by the originating investigators of the NPA87 cell line before the establishment of the NPA87 cell line (47). Thus, it is likely that the establishment of the NPA87 cell line is also due to cross-contamination.

The HT-29 colon cancer cell line was established in 1964 (30) and deposited into the ATCC in 1981 (48, 49). Previous studies have shown that the 1981 HT-29 stock deposited in the ATCC is genetically identical to an original HT-29 stock from 1967 (49), indicating that the ARO81-1 cell line and the MRO87-1 cell line from the Haugen laboratory were likely established by cross-contamination. The NPA87, ARO81-1, DRO90-1, and MRO87-1 cell lines and their respective sublines have been widely used as thyroid cancer models for the past 20 yr.

In conclusion, we have identified significant redundancy and misidentification among 20 of 40 thyroid cancer cell lines tested (50%). We found that Pax-8 and/or TTF-1 is expressed in the majority (15 of 23) of the unique cell lines. For cell lines that do not express either thyroid-specific gene, all are of anaplastic origin, suggesting that the loss of these genes could be due to the dedifferentiated phenotype. Based on the studies presented here, we believe the cell lines listed in Table 3 represent viable models to study thyroid cancer and at the time of this report, are unique.

## Acknowledgments

We thank Agnes Viale and the Genomics Core Laboratory at Memorial Sloan-Kettering Cancer Center for the single nucleotide polymorphism-congenital GH array genotyping, and Dr. Edward Highsmith and the Molecular Genetics Laboratory at Mayo Clinic for short tandem repeat analysis of cell lines. We also thank Dr. Stuart Aaronson for providing the early passage A-375 cell line, and Dr. Wilhelm Dirks for providing the DSMZ short tandem repeat database for these studies. We thank Cathy Rowe and Helen Philpott for searching the European Collection of Cell Culture short tandem repeat database with our short tandem repeat data set.

Address all correspondence and requests for reprints to: Rebecca E. Schweppe, Ph.D., Division of Endocrinology, Diabetes and Metabolism, University of Colorado Denver, Aurora, Colorado 80045. E-mail: Rebecca.Schweppe@ucdenver.edu.

This work was supported by ACS MRS-06-193-01-TBE (to J.P.K.); University of Colorado Cancer Center Sequencing Core P30 CA046934 (to C.K.); NIH-CA50706 (to J.A.F.); CA72597 (to J.A.F.); a Translational and Integrative Medicine Research Grant from Memorial Sloan-Kettering Cancer Center (to J.A.F.); the Margot Rosenberg Pulitzer Foundation (to J.A.F.); Florida Department of Health Grant 07BB-02-12297 (to J.A.C.), grant for rare cancers from Dr. Ellis and Dona Brunton (to J.A.C.); NIH P30CA15083 (Cancer Center Support Grant) (to R.C.S.); Mayo Clinic Research Committee (to R.C.S.); NCI CA100560 (to B.R.H.), Mary Rossick Kern and Jerome H Kern Endowment (to B.R.H.).

Disclosure Statement: The authors have nothing to disclose.

## References

- MacLeod RA, Dirks WG, Matsuo Y, Kaufmann M, Milch H, Drexler HG 1999 Widespread intraspecies cross-contamination of human tumor cell lines arising at source. *Int J Cancer* 83:555–563
- Hughes P, Marshall D, Reid Y, Parkes H, Gelber C 2007 The costs of using unauthenticated, over-passaged cell lines: how much more data do we need? *Biotechniques* 43:575–584
- Masters JR, Thomson JA, Daly-Burns B, Reid YA, Dirks WG, Packer P, Toji LH, Ohno T, Tanabe H, Arlett CF, Kelland LR, Harrison M, Virmani A, Ward TH, Ayres KL, Debenham PG 2001 Short tandem repeat profiling provides an international reference standard for human cell lines. *Proc Natl Acad Sci USA* 98:8012–8017
- Chatterjee R 2007 Cell biology. When 60 lines don't add up. *Science* 315:929
- Lacroix M 2008 Persistent use of “false” cell lines. *Int J Cancer* 122:1–4
- Chatterjee R 2007 Cell biology. Cases of mistaken identity. *Science* 315: 928–931
- van Bokhoven A, Varella-Garcia M, Korch C, Johannes WU, Smith EE, Miller HL, Nordeen SK, Miller GJ, Lucia MS 2003 Molecular characterization of human prostate carcinoma cell lines. *Prostate* 57:205–225
- van Bokhoven A, Varella-Garcia M, Korch C, Miller GJ 2001 TSU-Pr1 and JCA-1 cells are derivatives of T24 bladder carcinoma cells and are not of prostatic origin. *Cancer Res* 61:6340–6344
- van Bokhoven A, Varella-Garcia M, Korch C, Hessels D, Miller GJ 2001 Widely used prostate carcinoma cell lines share common origins. *Prostate* 47:36–51
- Ruiz Bravo N, Gottesman M 2007 Notice regarding authentication of cultured cell lines #NOT-OD-08-017. Bethesda, MD: National Institutes of Health
- Meireles AM, Preto A, Rocha AS, Rebocho AP, Maximo V, Pereira-Castro I, Moreira S, Feijao T, Botelho T, Marques R, Trovisco V, Cirnes L, Alves C, Velho S, Soares P, Sobrinho-Simoes M 2007 Molecular and genotypic characterization of human thyroid follicular cell carcinoma-derived cell lines. *Thyroid* 17:707–715
- van Staveren WC, Solis DW, Delys L, Duprez L, Andry G, Franc B, Thomas G, Libert F, Dumont JE, Detours V, Maenhaut C 2007 Human thyroid tumor cell lines derived from different tumor types present a common dedifferentiated phenotype. *Cancer Res* 67:8113–8120
- Rocha AS, De Wever O, Moreira S, Costa MJ, Vandekerckhove J, Mareel M, Soares P 2004 Mutated E-cadherin: genomic and functional characterization in thyroid cells from the KAT family. *Thyroid* 14:902–909
- Oldroyd NJ, Urquhart AJ, Kimpton CP, Millican ES, Watson SK, Downes T, Gill PD 1995 A highly discriminating octoplex short tandem repeat polymerase chain reaction system suitable for human individual identification. *Electrophoresis* 16:334–337
- Lee JJ, Foukakis T, Hashemi J, Grimelius L, Heldin NE, Wallin G, Rudduck C, Lui WO, Hoog A, Larsson C 2007 Molecular cytogenetic profiles of novel and established human anaplastic thyroid carcinoma models. *Thyroid* 17: 289–301
- Haugen BR, Larson LL, Pugazhenthi U, Hays WR, Klopper JP, Kramer CA, Sharma V 2004 Retinoic acid and retinoid X receptors are differentially expressed in thyroid cancer and thyroid carcinoma cell lines and predict response to treatment with retinoids. *J Clin Endocrinol Metab* 89:272–280
- Rae JM, Creighton CJ, Meck JM, Haddad BR, Johnson MD 2007 MDA-MB-435 cells are derived from M14 melanoma cells—a loss for breast cancer, but a boon for melanoma research. *Breast Cancer Res Treat* 104:13–19

18. Rae JM, Ramus SJ, Waltham M, Armes JE, Campbell IG, Clarke R, Barndt RJ, Johnson MD, Thompson EW 2004 Common origins of MDA-MB-435 cells from various sources with those shown to have melanoma properties. *Clin Exp Metastasis* 21:543–552
19. Chee DO, Boddie AW, Roth JA, Holmes EC, Morton DL 1976 Production of melanoma-associated antigen(s) by a defined malignant melanoma cell strain grown in chemically defined medium. *Cancer Res* 36:1503–1509
20. Hollestelle A, Elstrodt F, Nagel JH, Kallemijn WW, Schutte M 2007 Phosphatidylinositol-3-OH kinase or RAS pathway mutations in human breast cancer cell lines. *Mol Cancer Res* 5:195–201
21. McDermott U, Sharma SV, Dowell L, Greninger P, Montagut C, Lamb J, Archibald H, Raudales R, Tam A, Lee D, Rothenberg SM, Supko JG, Sordella R, Ulluks LE, Iafrate AJ, Maheswaran S, Njauw CN, Tsao H, Drew L, Hanke JH, Ma XJ, Erlander MG, Gray NS, Haber DA, Settleman J 2007 Identification of genotype-correlated sensitivity to selective kinase inhibitors by using high-throughput tumor cell line profiling. *Proc Natl Acad Sci USA* 104:19936–19941
22. Kimura ET, Nikiforova MN, Zhu Z, Knauf JA, Nikiforov YE, Fagin JA 2003 High prevalence of BRAF mutations in thyroid cancer: genetic evidence for constitutive activation of the RET/PTC-RAS-BRAF signaling pathway in papillary thyroid carcinoma. *Cancer Res* 63:1454–1457
23. Namba H, Nakashima M, Hayashi T, Hayashida N, Maeda S, Rogounovitch TI, Ohtsuru A, Saenko VA, Kanematsu T, Yamashita S 2003 Clinical implication of hot spot BRAF mutation, V599E, in papillary thyroid cancers. *J Clin Endocrinol Metab* 88:4393–4397
24. Xu X, Quiros RM, Gattuso P, Ain KB, Prinz RA 2003 High prevalence of BRAF gene mutation in papillary thyroid carcinomas and thyroid tumor cell lines. *Cancer Res* 63:4561–4567
25. Parson W, Kirchbner R, Muhlmann R, Renner K, Kofler A, Schmidt S, Kofler R 2005 Cancer cell line identification by short tandem repeat profiling: power and limitations. *FASEB J* 19:434–436
26. Nikiforova MN, Kimura ET, Gandhi M, Biddinger PW, Knauf JA, Basolo F, Zhu Z, Giannini R, Salvatore G, Fusco A, Santoro M, Fagin JA, Nikiforov YE 2003 BRAF mutations in thyroid tumors are restricted to papillary carcinomas and anaplastic or poorly differentiated carcinomas arising from papillary carcinomas. *J Clin Endocrinol Metab* 88:5399–5404
27. Xing M, Cohen Y, Mambo E, Tallini G, Udelsman R, Ladenson PW, Sidransky D 2004 Early occurrence of RASSF1A hypermethylation and its mutual exclusion with BRAF mutation in thyroid tumorigenesis. *Cancer Res* 64:1664–1668
28. Yuen ST, Davies H, Chan TL, Ho JW, Bignell GR, Cox C, Stephens P, Edkins S, Tsui WW, Chan AS, Futreal PA, Stratton MR, Wooster R, Leung SY 2002 Similarity of the phenotypic patterns associated with BRAF and KRAS mutations in colorectal neoplasia. *Cancer Res* 62:6451–6455
29. Davies H, Bignell GR, Cox C, Stephens P, Edkins S, Clegg S, Teague J, Woffendin H, Garnett MJ, Bottomley W, Davis N, Dicks E, Ewing R, Floyd Y, Gray K, Hall S, Hawes R, Hughes J, Kosmidou V, Menzies A, Mould C, Parker A, Stevens C, Watt S, Hooper S, Wilson R, Jayatilake H, Gusterson BA, Cooper C, Shipley J, Hargrave D, Pritchard-Jones K, Maitland N, Chenevix-Trench G, Riggins GJ, Bigner DD, Palmieri G, Cossu A, Flanagan A, Nicholson A, Ho JW, Leung SY, Yuen ST, Weber BL, Seigler HF, Darrow TL, Paterson H, Marais R, Marshall CJ, Wooster R, Stratton MR, Futreal PA 2002 Mutations of the BRAF gene in human cancer. *Nature* 417:949–954
30. Fogh J, Trempe G 1975 New human tumor cell lines. New York: Plenum Press
31. Tanaka J, Ogura T, Sato H, Hatano M 1987 Establishment and biological characterization of in vitro human cytomegalovirus latency model. *Virology* 161:62–72
32. Kurebayashi J, Tanaka K, Otsuki T, Moriya T, Kunisue H, Uno M, Sonoo H 2000 All-trans-retinoic acid modulates expression levels of thyroglobulin and cytokines in a new human poorly differentiated papillary thyroid carcinoma cell line, KTC-1. *J Clin Endocrinol Metab* 85:2889–2896
33. Yu H, Cook TJ, Sinko PJ 1997 Evidence for diminished functional expression of intestinal transporters in Caco-2 cell monolayers at high passages. *Pharm Res* 14:757–762
34. Briske-Anderson MJ, Finley JW, Newman SM 1997 The influence of culture time and passage number on the morphological and physiological development of Caco-2 cells. *Proc Soc Exp Biol Med* 214:248–257
35. Chang-Liu CM, Woloschak GE 1997 Effect of passage number on cellular response to DNA-damaging agents: cell survival and gene expression. *Cancer Lett* 113:77–86
36. Ohta K, Pang XP, Berg L, Hershman JM 1997 Growth inhibition of new human thyroid carcinoma cell lines by activation of adenylate cyclase through the  $\beta$ -adrenergic receptor. *J Clin Endocrinol Metab* 82:2633–2638
37. Liu D, Liu Z, Jiang D, Dackiw AP, Xing M 2007 Inhibitory effects of the mitogen-activated protein kinase kinase inhibitor CI-1040 on the proliferation and tumor growth of thyroid cancer cells with BRAF or RAS mutations. *J Clin Endocrinol Metab* 92:4686–4695
38. Ball DW, Jin N, Rosen DM, Dackiw A, Sidransky D, Xing M, Nelkin BD 2007 Selective growth inhibition in BRAF mutant thyroid cancer by the mitogen-activated protein kinase kinase 1/2 inhibitor AZD6244. *J Clin Endocrinol Metab* 92:4712–4718
39. Grimm D, Hofstadter F, Bauer J, Spruss T, Steinbach P, Bernhardt G, Menze R 1992 Establishment and characterization of a human papillary thyroid carcinoma cell line with oxyphilic differentiation (ONCO-DG 1). *Virchows Arch B Cell Pathol Incl Mol Pathol* 62:97–104
40. Rotolo S, Diotti R, Gordon RE, Qiao RF, Yao Z, Phelps RG, Dong J 2005 Effects on proliferation and melanogenesis by inhibition of mutant BRAF and expression of wild-type INK4A in melanoma cells. *Int J Cancer* 115:164–169
41. Christensen C, Guldberg P 2005 Growth factors rescue cutaneous melanoma cells from apoptosis induced by knockdown of mutated (V 600 E) B-RAF. *Oncogene* 24:6292–6302
42. Chen ST, Shieh HY, Lin JD, Chang KS, Lin KH 2000 Overexpression of thyroid hormone receptor  $\beta$ 1 is associated with thyrotropin receptor gene expression and proliferation in a human thyroid carcinoma cell line. *J Endocrinol* 165:379–389
43. Moretti F, Farsetti A, Soddu S, Misiti S, Crescenzi M, Filetti S, Andreoli M, Sacchi A, Pontecorvi A 1997 p53 re-expression inhibits proliferation and restores differentiation of human thyroid anaplastic carcinoma cells. *Oncogene* 14:729–740
44. Liu D, Hu S, Hou P, Jiang D, Condouris S, Xing M 2007 Suppression of BRAF/MEK/MAP kinase pathway restores expression of iodide-metabolizing genes in thyroid cells expressing the V600E BRAF mutant. *Clin Cancer Res* 13:1341–1349
45. Puppini C, D'Aurizio F, D'Elia AV, Cesaratto L, Tell G, Russo D, Filetti S, Ferretti E, Tosi E, Mattei T, Pianta A, Pellizzari L, Damante G 2005 Effects of histone acetylation on sodium iodide symporter promoter and expression of thyroid-specific transcription factors. *Endocrinology* 146:3967–3974
46. Giard DJ, Aaronson SA, Todaro GJ, Arnstein P, Kersey JH, Dosik H, Parks WP 1973 In vitro cultivation of human tumors: establishment of cell lines derived from a series of solid tumors. *J Natl Cancer Inst* 51:1417–1423
47. Ahn SS, Irie RF, Weisenburger TH, Jones PC, Juillard G, Roe DJ, Morton DL 1982 Humoral immune response to intralymphatic immunotherapy for disseminated melanoma: correlation with clinical response. *Surgery* 92:362–367
48. Hay RJ 1984 Banking and strain data of cell cultures. *In vitro TCA Monograph* 5:215–224
49. Chen TR, Drabkowski D, Hay RJ, Macy M, Peterson Jr W 1987 WiDr is a derivative of another colon adenocarcinoma cell line, HT-29. *Cancer Genet Cytogenet* 72:125–134
50. Weber CJ, Marvin M, Krekun S, Koschitzky T, Karp F, Benson M, Feind CR 1990 Effects of tamoxifen and somatostatin analogue on growth of human medullary, follicular, and papillary thyroid carcinoma cell lines: tissue culture and nude mouse xenograft studies. *Surgery* 108:1065–1071
51. Melillo RM, Castellone MD, Guarino V, De Falco V, Cirafici AM, Salvatore G, Caiazzo F, Basolo F, Giannini R, Kruhoffer M, Orntoft T, Fusco A, Santoro M 2005 The RET/PTC-RAS-BRAF linear signaling cascade mediates the motile and mitogenic phenotype of thyroid cancer cells. *J Clin Invest* 115:1068–1081
52. Ohta K, Pang XP, Berg L, Hershman JM 1996 Antitumor actions of cytokines on new human papillary thyroid carcinoma cell lines. *J Clin Endocrinol Metab* 81:2607–2612
53. Guarino V, Faviana P, Salvatore G, Castellone MD, Cirafici AM, De Falco V, Celetti A, Giannini R, Basolo F, Melillo RM, Santoro M 2005 Osteopontin is overexpressed in human papillary thyroid carcinomas and enhances thyroid carcinoma cell invasiveness. *J Clin Endocrinol Metab* 90:5270–5278
54. Wang SH, Phelps E, Utsugi S, Baker Jr JR 2001 Susceptibility of thyroid cancer cells to 7-hydroxystaurosporine-induced apoptosis correlates with Bcl-2 protein level. *Thyroid* 11:725–731
55. Ain KB, Taylor KD, Tofiq S, Venkataraman G 1997 Somatostatin receptor subtype expression in human thyroid and thyroid carcinoma cell lines. *J Clin Endocrinol Metab* 82:1857–1862
56. Challeton C, Branea F, Schlumberger M, Gaillard N, de Vathaire F, Badie C, Antonini P, Parmentier C 1997 Characterization and radiosensitivity at high or low dose rate of four cell lines derived from human thyroid tumors. *Int J Radiat Oncol Biol Phys* 37:163–169
57. Finn S, Smyth P, O'Regan E, Cahill S, Toner M, Timon C, Flavin R, O'Leary J, Sheils O 2007 Low-level genomic instability is a feature of papillary thyroid carcinoma: an array comparative genomic hybridization study of laser capture microdissected papillary thyroid carcinoma tumors and clonal cell lines. *Arch Pathol Lab Med* 131:65–73
58. Fabien N, Fusco A, Santoro M, Barbier Y, Dubois PM, Paulin C 1994 De-

- scription of a human papillary thyroid carcinoma cell line. Morphologic study and expression of tumoral markers. *Cancer* 73:2206–2212
59. Venkataraman GM, Yatin M, Ain KB 1998 Cloning of the human sodium-iodide symporter promoter and characterization in a differentiated human thyroid cell line, KAT-50. *Thyroid* 8:63–69
  60. Geldof AA, Versteegh LRT, van Mourik JC, Rooimans MA, Arwert F, Hermsen MA, Schadee-Eestermans IL, van Dongen GA, van der Valk P, van der Clement EHP, Lips P, Teule GJ 2001 Clonally related but phenotypically divergent human cancer cell lines derived from a single follicular thyroid cancer recurrence (TT2609). *Thyroid* 11:909–917
  61. Goretzki PE, Frilling A, Simon D, Rastegar M, Ohmann C 1989 Growth regulation of human thyrocytes by thyrotropin, cyclic adenosine monophosphate, epidermal growth factor and insulin-like growth factor. In: Goretzki PE, Röher WD, eds. *Frontiers of hormone research*. Vol 18. Basel, Switzerland: Karger; 56–80
  62. Goretzki PE, Frilling A, Simon D, Roeher HD 1990 Growth regulation of normal thyroids and thyroid tumors in man. *Recent Results Cancer Res* 118:48–63
  63. Schonberger J, Bauer J, Spruss T, Weber G, Chahoud I, Eilles C, Grimm D 2000 Establishment and characterization of the follicular thyroid carcinoma cell line ML-1. *J Mol Med* 78:102–110
  64. Estour B, Van Herle AJ, Juillard GJ, Totanes TL, Sparkes RS, Giuliano AE, Klandorf H 1989 Characterization of a human follicular thyroid carcinoma cell line (UCLA RO 82 W-1). *Virchows Arch B Cell Pathol Incl Mol Pathol* 57:167–174
  65. Pang XP, Hershman JM, Chung M, Pekary AE 1989 Characterization of tumor necrosis factor- $\alpha$  receptors in human and rat thyroid cells and regulation of the receptors by thyrotropin. *Endocrinology* 125:1783–1788
  66. Ain K, Taylor K, Banks E, ALP 1992 Characterization of an immortalized cell-line (KAK-1) from a benign human thyroid follicular adenoma. *Thyroid* 2:S49
  67. Venkataraman GM, Yatin M, Marcinek R, Ain KB 1999 Restoration of iodide uptake in dedifferentiated thyroid carcinoma: relationship to human Na<sup>+</sup>/I<sup>-</sup> symporter gene methylation status. *J Clin Endocrinol Metab* 84:2449–2457
  68. Ain KB, Taylor KD 1994 Somatostatin analogs affect proliferation of human thyroid carcinoma cell lines *in vitro*. *J Clin Endocrinol Metab* 78:1097–1102
  69. Nishihara E, Nagayama Y, Mawatari F, Tanaka K, Namba H, Niwa M, Yamashita S 1997 Retrovirus-mediated herpes simplex virus thymidine kinase gene transduction renders human thyroid carcinoma cell lines sensitive to ganciclovir and radiation *in vitro* and *in vivo*. *Endocrinology* 138:4577–4583
  70. Lahat N, Sheinfeld M, Sobel E, Kinarty A, Kraiem Z 1992 Divergent effects of cytokines on human leukocyte antigen-DR antigen expression of neoplastic and non-neoplastic human thyroid cells. *Cancer* 69:1799–1807
  71. Boghaert ER, Ain K, Taylor K, Greenberg VL, Fowler C, Zimmer SG 1996 Quantitative and qualitative differences in growth, invasion and lung colonization of an anaplastic and a papillary human thyroid cancer cell line *in vitro* and *in vivo*. *Clin Exp Metastasis* 14:440–450
  72. Ito T, Seyama T, Iwamoto KS, Hayashi T, Mizuno T, Tsuyama N, Dohi K, Nakamura N, Akiyama M 1993 *In vitro* irradiation is able to cause RET oncogene rearrangement. *Cancer Res* 53:2940–2943
  73. Gioanni J, Zanghellini E, Mazeau C, Zhang D, Courdi A, Farges M, Lambert JC, Duplay H, Schneider M 1991 [Characterization of a human cell line from an anaplastic carcinoma of the thyroid gland]. *Bull Cancer* 78:1053–1062 (French)
  74. Rodrigues RF, Roque L, Krug T, Leite V 2007 Poorly differentiated and anaplastic thyroid carcinomas: chromosomal and oligo-array profile of five new cell lines. *Br J Cancer* 96:1237–1245
  75. Chung SH, Onoda N, Ishikawa T, Ogisawa K, Takenaka C, Yano Y, Hato F, Hirakawa K 2002 Peroxisome proliferator-activated receptor  $\gamma$  activation induces cell cycle arrest via the p53-independent pathway in human anaplastic thyroid cancer cells. *Jpn J Cancer Res* 93:1358–1365
  76. Carlsson J, Nilsson K, Westermark B, Ponten J, Sundstrom C, Larsson E, Bergh J, Pahlman S, Busch C, Collins VP 1983 Formation and growth of multicellular spheroids of human origin. *Int J Cancer* 31:523–533
  77. Heldin NE, Cvejic D, Smeds S, Westermark B 1991 Coexpression of functionally active receptors for thyrotropin and platelet-derived growth factor in human thyroid carcinoma cells. *Endocrinology* 129:2187–2193
  78. Yano Y, Kamma H, Matsumoto H, Fujiwara M, Bando H, Hara H, Yashiro T, Ueno E, Ito K, Uchida K 2007 Growth suppression of thyroid cancer cells by adenylcyclase activator. *Oncol Rep* 18:441–445
  79. Gustavsson B, Hermansson A, Andersson AC, Grimelius L, Bergh J, Westermark B, Heldin NE 1996 Decreased growth rate and tumour formation of human anaplastic thyroid carcinoma cells transfected with a human thyrotropin receptor cDNA in NMRI nude mice treated with propylthiouracil. *Mol Cell Endocrinol* 121:143–151
  80. Palyi I, Peter I, Daubner D, Vincze B, Lorincz I 1993 Establishment, characterization and drug sensitivity of a new anaplastic thyroid carcinoma cell line (BHT-101). *Virchows Arch B Cell Pathol Incl Mol Pathol* 63:263–269
  81. Kurebayashi J, Otsuki T, Tanaka K, Yamamoto Y, Moriya T, Sonoo H 2003 Medroxyprogesterone acetate decreases secretion of interleukin-6 and parathyroid hormone-related protein in a new anaplastic thyroid cancer cell line, KTC-2. *Thyroid* 13:249–258
  82. Leboeuf R, Baumgartner JE, Benezra M, Malaguarnera R, Solit D, Pratilas CA, Rosen N, Knauf JA, Fagin JA 2008 BRAFV600E mutation is associated with preferential sensitivity to MEK inhibition in thyroid cancer cell lines. *J Clin Endocrinol Metab* 93:2194–2201
